# Supplementary material
Source: bioRxiv or medRxiv preprint supplement (https://medrxiv.org/highwire/filestream/91151/field_highwire_adjunct_files/0/2020.07.25.20162131-1.pdf)
Supplement: Supplementary file [file 2020.07.25.20162131-1.pdf]

# Supplementary Material for A Bayesian Framework for Estimating the Risk Ratio of Hospitalization for People with Comorbidity Infected by the SARS- CoV-2 Virus

Xiang Gao<sup>1</sup> and Qunfeng Dong<sup>1,2\*</sup>

<sup>1</sup>Department of Medicine, <sup>2</sup>Center for Biomedical Informatics, Stritch School of Medicine, Loyola University Chicago, Maywood, Illinois 60153, U.S.A

\*Corresponding author: Qunfeng Dong

Email: [gdong@luc.edu](mailto:gdong@luc.edu)

## WinBUGS Code and Data

Last update on July 25, 2020

```
##### Model #####
model{
  #multinomial sampling distribution
  #count[1] is for #of "healthy" inpatients without any comorbidity
  #count[2] is of #of inpatients with the comorbidity of interest
  #count[2] is of #of inpatients with all the other types of comorbidities combined
  count[1:3] ~ dmulti(theta[], N) #multinomial sampling distribution

  #define prior probability
  theta[1:3] ~ ddirch(alpha[]) #theta[1] h - health, no medical comorbidity
  #theta[2] c - comorbidity of interest
  #theta[3] o - other comorbidities

  Kh ~ dbeta(Akh, Bkh) #Kh prevalence of healthy people without any comorbidity in the general population
  Kc ~ dbeta(Akc, Bkc) #Kc prevalence of the comorbidity of interest in the general population

  #parameterization of beta distribution using the method of moments
  #(MU is the expected prevalence, SE is the standard deviation; both from published literature
  Akh <- MUh*(MUh*(1-MUh))/(SEh*SEh) -1
  Bkh <- (1-MUh)*(MUh*(1-MUh))/(SEh*SEh) -1
  Akc <- MUC*(MUC*(1-MUC))/(SEc*SEc) -1
  Bkc <- (1-MUC)*(MUC*(1-MUC))/(SEc*SEc) -1

  #output of interest - relative risk
  RRch <- (theta[2]/theta[1])*(Kh/Kc)
}

##### WinBUGS parameters #####
4 chains, beg=10,000, thin=4, updates=100,000

##### Data and parameters#####
#####12.2% are healthy people in the general population#
#(MUh = 0.122, 95CI=(10.9-13.6), SEh=(13.6-12.2)/1.96 = 0.007142857:

##### Hypertension ###
#MUC=0.491,SEc=0.015 CDC hypertension prevalence

#COVID-NET March 1 - May 2 dataset:
#N=2491, total number of inpatients
#2491-2278 = 213 inpatients without any comorbidity
#1428 with hypertension
#2491 - 213 -1428 = 850 with other types of conditions
# alpha=c(1,1,1) prior parameters for dirichlet
list(MUh = 0.122, SEh=0.007142857,MUC=0.491,SEc=0.015,N=2491,count=c(213,1428,850), alpha=c(1,1,1))
```

```

#NY JAMA dataset
#N=5100, total number of inpatients
#350 inpatients without any comorbidity
#3026 hypertension
#5100-350-3026=1724 with other types of conditions
#alpha=c(1,1,1) prior parameters for dirichlet
list(MUH=0.122,SEh=0.007142857,MUc=0.491,SEc=0.015, N=5100, count=c(350,3026,1724), alpha=c(1,1,1))

##### Obesity #####
#MUc = 0.424, SEc=0.018: CDC all age obesity prevalence

#COVID-NET dataset March 1 - May 2 :
#N=2491, total number of inpatients
#213 are inpatients without any comorbidity
#1154 with obesity
#2491-213-1154 = 1124 with other types of conditions
#alpha=c(1,1,1) prior parameters for dirichlet
list(MUH=0.122,SEh=0.007142857,MUc = 0.424,SEc=0.018,N=2491,count=c(213,1154, 1124), alpha=c(1,1,1))

#NY JAMA dataset
#N=5100, total number of inpatients
#350 inpatients without any comorbidity
#1737 obesity
#5100-350-1737=3013 other medical conditions
#alpha=c(1,1,1) prior parameters for dirichlet
list(MUH=0.122,SEh=0.007142857,MUc=0.424,SEc=0.018,N=5100,count=c(350,1737,3013), alpha=c(1,1,1))

##### Diabetes #####
#MUc = 0.13, SEc=0.005612245.: CDC all age diabetes prevalence
#all ages total diabetes prevalence [ mu=13%, 95CI(12-14.1)%, se=(14.1-13)/1.96=0.5612245%

#COVID-NET March 1 - May 2 dataset
#N=2491, total number of inpatients
#213 are inpatients without any comorbidity
#819 diabetes
#2491-213-819=1459 with other conditions
#alpha=c(1,1,1) prior parameters for dirichlet
list(MUH=0.122,SEh=0.007142857,MUc = 0.13,SEc=0.005612245,N=2491,count=c(213,819, 1459),alpha=c(1,1,1))

#NY JAMA dataset
#N=5100, total number of inpatients
#350 inpatients without any comorbidity
#1808 diabetes
#5100-350-1808=2942 other medical conditions
#alpha=c(1,1,1) prior parameters for dirichlet
list(MUH=0.122,SEh=0.007142857,MUc=0.13,SEc=0.005612245,N=5100,count=c(350,1808,2942),alpha=c(1,1,1))

##### Asthma #####
#CDC all age hospitalization and CDC asthma prevalence [mu=7.7%, SE=0.22%]

#COVID-NET March 1 - May 2 dataset
#N=2491, total number of inpatients
#213 are inpatients without any comorbidity
#314 with asthma
#2491 - 213 - 314 = 1964 with other types of conditions
#alpha=c(1,1,1) prior parameters for dirichlet
list(MUH=0.122,SEh=0.007142857,MUc = 0.077,SEc=0.0022,N=2491,count=c(213,314,1964),alpha=c(1,1,1))

#NY JAMA dataset:
#N=5100, total number of inpatients
#350 are inpatients without any comorbidity
#479 with asthma
#5100- 350- 479 = 4271 with other types of conditions
#alpha=c(1,1,1) prior parameters for dirichlet
list(MUH=0.122,SEh=0.007142857,MUc = 0.077,SEc=0.0022,N=5100,count=c(350,479, 4271),alpha=c(1,1,1))

##### coronary artery disease or congestive heart failure #####
#CDC all age hospitalization and CDC prevalence [ mu=5.3% SE=0.61%] ("coronary heart disease") in CDC
#includeing coronary heart disease, angina, or heart attack.

```

#COVID-NET March 1 - May 2 dataset:  
#N=2491, total number of inpatients  
#213 are inpatients without any comorbidity  
#636 with either coronary artery disease or congestive heart failure,  
#2491-213-636 = 1419 with other types of conditions  
#alpha=c(1,1,1) prior parameters for dirichlet  
list(MUH=0.122,SEh=0.007142857,MUC=0.053,SEc=0.0061,N=2491,count=c(213,636,1419),alpha=c(1,1,1))

#NY JAMA dataset:  
#N=5100, total number of inpatients  
#350 are inpatients without any comorbidity  
#595+371=966 with coronary artery disease or congestive heart failure  
#5100-350-966 = 3784 with other types of conditions  
list(MUH=0.122,SEh=0.007142857,MUC=0.053,SEc=0.0061,N=5100,count=c(350,966,3784),alpha=c(1,1,1))

##### COPD ####  
#CDC COPD prevalence [ mu=5.9% 95CI: 5.8-6.0: SE=(6-5.9)/1.96=0.051%]

#COVID-NET March 1 - May 2 dataset:  
#N=2491, total number of inpatients  
#213 are inpatients without any comorbidity  
#266 COPD  
#2491-213-266 = 2012 with other types of conditions  
#alpha=c(1,1,1) prior parameters for dirichlet  
list(MUH=0.122,SEh=0.007142857,MUC=0.059,SEc=0.00051,N=2491,count=c(213,266,2012),alpha=c(1,1,1))  
#done

#NY JAMA dataset  
#N=5100, total number of inpatients  
#350 are inpatients without any comorbidity  
#287 COPD,  
#5100-350-287 = 4463 with other types of conditions  
#alpha=c(1,1,1) prior parameters for dirichlet  
list(MUH=0.122,SEh=0.007142857,MUC=0.059,SEc=0.00051,N=5100,count=c(350,287,4463),alpha=c(1,1,1))  
#####
